# Supplementary material for: Assessing acute kidney injury risk after COVID vaccination and infection in a large cohort study
Source: PubMed Central journal article supplement — NPJ Vaccines. 2024 Nov 8;9:213. doi: 10.1038/s41541-024-00964-3 (PMC11549351; doi:10.1038/s41541-024-00964-3), 2024-11-08
Supplement: 41541_2024_964_MOESM1_ESM.pdf [file 41541_2024_964_MOESM1_ESM.pdf]

# Supplementary Materials

## **Assessing Acute Kidney Injury Risk After COVID Vaccination and Infection in a Large Cohort Study**

**Supplementary Table 1:** Concept IDs Used to Define COVID-19 Vaccination, COVID-19 Infection and Acute Kidney Injury in N3C

**Supplementary Table 2:** Baseline Characteristics of AKI Patients of COVID-19 Vaccination Group and Infection Group

**Supplementary Figure 1 a, d, c:** Comparative Kaplan-Meier Analysis of Acute Kidney Injury Incidence within 30 Days Following the Exposure to COVID-19 Antigens by Different Phases Based on Predominant Strains Phases

**Supplementary Figure 2 a, b:** Comparative Kaplan-Meier Analysis of Acute Kidney Injury Incidence after Exposure to COVID-19 Antigens in 60-day and 90-day Follow-up Periods

**Supplementary Figure 3:** Association of COVID-19 Vaccination and Infection with AKI Outcomes: Multivariable-Adjusted Cox Model Results by Follow-up Periods, AKI Measurements, and Dominant COVID-19 Strains Phases

**Supplementary Table 1 a, b, c, d: Concept IDs Used to Define COVID-19 Vaccination, COVID-19 Infection and Acute Kidney Injury (AKI) in N3C**

**Supplementary Table 1.a: COVID-19 Vaccines Concepts IDs**

| <b>Concept IDs</b> | <b>Concept name</b>                                                                                                                                  |
|--------------------|------------------------------------------------------------------------------------------------------------------------------------------------------|
| 42649039           | MODERNA COVID-19 VACCINE, BIVALENT - moderna covid-19 vaccine, bivalent injection, suspension                                                        |
| 37003432           | SARS-CoV-2 (COVID-19) vaccine, mRNA spike protein                                                                                                    |
| 37003434           | SARS-CoV-2 (COVID-19) vaccine, mRNA spike protein Injectable Product                                                                                 |
| 37003435           | SARS-CoV-2 (COVID-19) vaccine, mRNA spike protein Injectable Suspension                                                                              |
| 1759205            | SARS-CoV-2 (COVID-19) vaccine, mRNA spike protein Injectable Suspension [Comirnaty]                                                                  |
| 779678             | SARS-CoV-2 (COVID-19) vaccine, mRNA spike protein Injectable Suspension [Spikevax]                                                                   |
| 1525539            | SARS-CoV-2 (COVID-19) vaccine, mRNA spike protein Injection                                                                                          |
| 722118             | SARS-COV-2 (COVID-19) vaccine, mRNA, spike protein, LNP, bivalent, preservative free, 10 mcg/0.2 mL dose                                             |
| 722117             | SARS-COV-2 (COVID-19) vaccine, mRNA, spike protein, LNP, bivalent, preservative free, 10 mcg/0.2 mL dose, tris-sucrose formulation                   |
| 722119             | SARS-COV-2 (COVID-19) vaccine, mRNA, spike protein, LNP, bivalent, preservative free, 3 mcg/0.2 mL dose, tris-sucrose formulation                    |
| 722120             | SARS-COV-2 (COVID-19) vaccine, mRNA, spike protein, LNP, bivalent, preservative free, 30 mcg/0.3 mL dose, tris-sucrose formulation                   |
| 778267             | SARS-COV-2 (COVID-19) vaccine, mRNA, spike protein, LNP, bivalent, preservative free, 50 mcg/0.5 mL or 25 mcg/0.25 mL dose                           |
| 702678             | SARS-COV-2 (COVID-19) vaccine, mRNA, spike protein, LNP, preservative free, 10 mcg/0.2mL dose, tris-sucrose formulation                              |
| 724906             | SARS-COV-2 (COVID-19) vaccine, mRNA, spike protein, LNP, preservative free, 100 mcg/0.5mL dose or 50 mcg/0.25mL dose                                 |
| 702676             | SARS-COV-2 (COVID-19) vaccine, mRNA, spike protein, LNP, preservative free, 3 mcg/0.2mL dose, tris-sucrose formulation                               |
| 724907             | SARS-COV-2 (COVID-19) vaccine, mRNA, spike protein, LNP, preservative free, 30 mcg/0.3mL dose                                                        |
| 702677             | SARS-COV-2 (COVID-19) vaccine, mRNA, spike protein, LNP, preservative free, 30 mcg/0.3mL dose, tris-sucrose formulation                              |
| 905420             | SARS-COV-2 (COVID-19) vaccine, mRNA, spike protein, LNP, preservative free, 50 mcg/0.5 mL dose                                                       |
| 778266             | SARS-COV-2 (COVID-19) vaccine, mRNA, spike protein, LNP, preservative free, pediatric 25 mcg/0.25 mL dose                                            |
| 778265             | SARS-COV-2 (COVID-19) vaccine, mRNA, spike protein, LNP, preservative free, pediatric 50 mcg/0.5 mL dose                                             |
| 37003516           | SARS-CoV-2 (COVID-19) vaccine, mRNA-1273                                                                                                             |
| 742036             | SARS-CoV-2 (COVID-19) vaccine, mRNA-1273 0.025 MG/ML                                                                                                 |
| 42647483           | SARS-CoV-2 (COVID-19) vaccine, mRNA-1273 0.025 MG/ML / SARS-CoV-2 (COVID-19) vaccine, mRNA-1273OMICRON (BA.4/BA.5) 0.025 MG/ML Injectable Suspension |
| 1525540            | SARS-CoV-2 (COVID-19) vaccine, mRNA-1273 0.05 MG/ML                                                                                                  |
| 36868353           | SARS-CoV-2 (COVID-19) vaccine, mRNA-1273 0.05 MG/ML / SARS-CoV-2 (COVID-19) vaccine, mRNA-1273OMICRON (BA.4/BA.5) 0.05 MG/ML Injectable Suspension   |
| 779413             | SARS-CoV-2 (COVID-19) vaccine, mRNA-1273 0.1 MG/ML                                                                                                   |

|          |                                                                                                                                                                                                                                                                                                          |
|----------|----------------------------------------------------------------------------------------------------------------------------------------------------------------------------------------------------------------------------------------------------------------------------------------------------------|
| 42631341 | SARS-CoV-2 (COVID-19) vaccine, mRNA-1273 0.1 MG/ML Injectable Suspension                                                                                                                                                                                                                                 |
| 37003517 | SARS-CoV-2 (COVID-19) vaccine, mRNA-1273 0.2 MG/ML                                                                                                                                                                                                                                                       |
| 779676   | SARS-CoV-2 (COVID-19) vaccine, mRNA-1273 0.2 MG/ML [Spikevax]                                                                                                                                                                                                                                            |
| 42796198 | SARS-CoV-2 (COVID-19) vaccine, mRNA-1273 0.2 MG/ML Injectable Suspension                                                                                                                                                                                                                                 |
| 779679   | SARS-CoV-2 (COVID-19) vaccine, mRNA-1273 0.2 MG/ML Injectable Suspension [Spikevax]                                                                                                                                                                                                                      |
| 1525541  | SARS-CoV-2 (COVID-19) vaccine, mRNA-1273OMICRON (BA.4/BA.5)                                                                                                                                                                                                                                              |
| 742037   | SARS-CoV-2 (COVID-19) vaccine, mRNA-1273OMICRON (BA.4/BA.5) 0.025 MG/ML                                                                                                                                                                                                                                  |
| 1525542  | SARS-CoV-2 (COVID-19) vaccine, mRNA-1273OMICRON (BA.4/BA.5) 0.05 MG/ML                                                                                                                                                                                                                                   |
| 37003431 | Immunization administration by intramuscular injection of severe acute respiratory syndrome coronavirus 2 (SARS-CoV-2) (coronavirus disease [COVID-19]) vaccine, DNA, spike protein, adenovirus type 26 (Ad26) vector, preservative free, 5x10 <sup>10</sup> viral particles/0.5 mL dosage; booster dose |
| 742039   | SARS-CoV-2 (COVID-19) vaccine, mRNA-BNT162b2 0.0075 MG/ML                                                                                                                                                                                                                                                |
| 36873496 | SARS-CoV-2 (COVID-19) vaccine, mRNA-BNT162b2 0.0075 MG/ML / SARS-CoV-2 (COVID-19) vaccine, mRNA-BNT162b2OMICRON (BA.4/BA.5) 0.0075 MG/ML Injectable Suspension                                                                                                                                           |
| 779947   | SARS-CoV-2 (COVID-19) vaccine, mRNA-BNT162b2 0.015 MG/ML                                                                                                                                                                                                                                                 |
| 1799557  | SARS-CoV-2 (COVID-19) vaccine, mRNA-BNT162b2 0.015 MG/ML Injectable Suspension                                                                                                                                                                                                                           |
| 742008   | SARS-CoV-2 (COVID-19) vaccine, mRNA-BNT162b2 0.025 MG/ML                                                                                                                                                                                                                                                 |
| 36873497 | SARS-CoV-2 (COVID-19) vaccine, mRNA-BNT162b2 0.025 MG/ML / SARS-CoV-2 (COVID-19) vaccine, mRNA-BNT162b2OMICRON (BA.4/BA.5) 0.025 MG/ML Injectable Suspension                                                                                                                                             |
| 702117   | SARS-CoV-2 (COVID-19) vaccine, mRNA-BNT162b2 0.05 MG/ML                                                                                                                                                                                                                                                  |
| 36873120 | SARS-CoV-2 (COVID-19) vaccine, mRNA-BNT162b2 0.05 MG/ML / SARS-CoV-2 (COVID-19) vaccine, mRNA-BNT162b2OMICRON (BA.4/BA.5) 0.05 MG/ML Injectable Suspension                                                                                                                                               |
| 1525545  | SARS-CoV-2 (COVID-19) vaccine, mRNA-BNT162b2 0.05 MG/ML / SARS-CoV-2 (COVID-19) vaccine, mRNA-BNT162b2OMICRON (BA.4/BA.5) 0.05 MG/ML Injection                                                                                                                                                           |
| 1799562  | SARS-CoV-2 (COVID-19) vaccine, mRNA-BNT162b2 0.05 MG/ML Injectable Suspension                                                                                                                                                                                                                            |
| 37003433 | SARS-CoV-2 (COVID-19) vaccine, mRNA-BNT162b2 0.1 MG/ML                                                                                                                                                                                                                                                   |
| 1759203  | SARS-CoV-2 (COVID-19) vaccine, mRNA-BNT162b2 0.1 MG/ML [Comirnaty]                                                                                                                                                                                                                                       |
| 42797616 | SARS-CoV-2 (COVID-19) vaccine, mRNA-BNT162b2 0.1 MG/ML Injectable Suspension                                                                                                                                                                                                                             |
| 36900252 | SARS-CoV-2 (COVID-19) vaccine, mRNA-BNT162b2 0.1 MG/ML Injectable Suspension [Comirnaty]                                                                                                                                                                                                                 |
| 1525509  | SARS-CoV-2 (COVID-19) vaccine, mRNA-BNT162b2OMICRON (BA.4/BA.5)                                                                                                                                                                                                                                          |
| 742040   | SARS-CoV-2 (COVID-19) vaccine, mRNA-BNT162b2OMICRON (BA.4/BA.5) 0.0075 MG/ML                                                                                                                                                                                                                             |
| 1525544  | SARS-CoV-2 (COVID-19) vaccine, mRNA-BNT162b2OMICRON (BA.4/BA.5) 0.05 MG/ML                                                                                                                                                                                                                               |
| 780154   | SARS-COV-2 (COVID-19) vaccine, subunit, recombinant spike protein Injectable Product                                                                                                                                                                                                                     |
| 780155   | SARS-COV-2 (COVID-19) vaccine, subunit, recombinant spike protein Injectable Suspension                                                                                                                                                                                                                  |
| 702679   | SARS-COV-2 (COVID-19) vaccine, subunit, recombinant spike protein-nanoparticle+Matrix-M1 Adjuvant, preservative free, 0.5mL dose                                                                                                                                                                         |
| 739901   | SARS-COV-2 (COVID-19) vaccine, vector - Ad26                                                                                                                                                                                                                                                             |
| 739903   | SARS-COV-2 (COVID-19) vaccine, vector - Ad26 100000000000 UNT/ML                                                                                                                                                                                                                                         |
| 1226309  | SARS-COV-2 (COVID-19) vaccine, vector - Ad26 100000000000 UNT/ML Injectable Suspension                                                                                                                                                                                                                   |

|        |                                                                                                                                                                                                                                            |
|--------|--------------------------------------------------------------------------------------------------------------------------------------------------------------------------------------------------------------------------------------------|
| 766241 | Severeacuterespiratorysyndromecoronavirus2(SARS-CoV-2)(coronavirusdisease[COVID-19])vaccine,DNA,spikeprotein,adenovirustype26(Ad26)vector,preservativefree,5x10 <sup>10</sup> viral particles/0.5mLdosage,forintramuscularuse              |
| 766240 | Severeacuterespiratorysyndromecoronavirus2(SARS-CoV-2)(coronavirusdisease[COVID-19])vaccine,DNA,spikeprotein,chimpanzeeadenovirusOxford1(ChAdOx1)vector,preservativefree,5x10 <sup>10</sup> viralparticles/0.5mLdosage,forintramuscularuse |
| 759696 | Severeacuterespiratorysyndromecoronavirus2(SARS-CoV-2)(coronavirusdisease[COVID-19])vaccine,monovalent,preservativefree,5mcg/0.5mLdosage,adjuvantAS03emulsion,forintramuscularuse                                                          |
| 777323 | Severeacuterespiratorysyndromecoronavirus2(SARS-CoV-2)(coronavirusdisease[COVID-19])vaccine,mRNA-LNP,bivalentspikeprotein,preservativefree,10mcg/0.2mLdosage,diluentreconstituted,tris-sucroseformulation,forintramuscularuse              |
| 733013 | Severeacuterespiratorysyndromecoronavirus2(SARS-CoV-2)(coronavirusdisease[COVID-19])vaccine,mRNA-LNP,bivalentspikeprotein,preservativefree,3mcg/0.2mLdosage,diluentreconstituted,tris-sucroseformulation,forintramuscularuse               |
| 777320 | Severeacuterespiratorysyndromecoronavirus2(SARS-CoV-2)(coronavirusdisease[COVID-19])vaccine,mRNA-LNP,bivalentspikeprotein,preservativefree,30mcg/0.3mLdosage,tris-sucroseformulation,forintramuscularuse                                   |
| 733014 | Severeacuterespiratorysyndromecoronavirus2(SARS-CoV-2)(coronavirusdisease[COVID-19])vaccine,mRNA-LNP,spikeprotein,bivalent,preservativefree,10mcg/0.2mLdosage,forintramuscularuse                                                          |
| 777322 | Severeacuterespiratorysyndromecoronavirus2(SARS-CoV-2)(coronavirusdisease[COVID-19])vaccine,mRNA-LNP,spikeprotein,bivalent,preservativefree,25mcg/0.25mLdosage,forintramuscularuse                                                         |
| 777321 | Severeacuterespiratorysyndromecoronavirus2(SARS-CoV-2)(coronavirusdisease[COVID-19])vaccine,mRNA-LNP,spikeprotein,bivalent,preservativefree,50mcg/0.5mLdosage,forintramuscularuse                                                          |
| 759738 | Severeacuterespiratorysyndromecoronavirus2(SARS-CoV-2)(coronavirusdisease[COVID-19])vaccine,mRNA-LNP,spikeprotein,preservativefree,10mcg/0.2mLdosage,diluentreconstituted,tris-sucroseformulation,forintramuscularuse                      |
| 766239 | Severeacuterespiratorysyndromecoronavirus2(SARS-CoV-2)(coronavirusdisease[COVID-19])vaccine,mRNA-LNP,spikeprotein,preservativefree,100mcg/0.5mLdosage,forintramuscularuse                                                                  |
| 777319 | Severeacuterespiratorysyndromecoronavirus2(SARS-CoV-2)(coronavirusdisease[COVID-19])vaccine,mRNA-LNP,spikeprotein,preservativefree,25mcg/0.25mLdosage,forintramuscularuse                                                                  |
| 759694 | Severeacuterespiratorysyndromecoronavirus2(SARS-CoV-2)(coronavirusdisease[COVID-19])vaccine,mRNA-LNP,spikeprotein,preservativefree,3mcg/0.2mLdosage,diluentreconstituted,tris-sucroseformulation,forintramuscularuse                       |
| 766238 | Severeacuterespiratorysyndromecoronavirus2(SARS-CoV-2)(coronavirusdisease[COVID-19])vaccine,mRNA-LNP,spikeprotein,preservativefree,30mcg/0.3mLdosage,diluentreconstituted,forintramuscularuse                                              |
| 759736 | Severeacuterespiratorysyndromecoronavirus2(SARS-CoV-2)(coronavirusdisease[COVID-19])vaccine,mRNA-LNP,spikeprotein,preservativefree,30mcg/0.3mLdosage,tris-sucroseformulation,forintramuscularuse                                           |
| 759737 | Severeacuterespiratorysyndromecoronavirus2(SARS-CoV-2)(coronavirusdisease[COVID-19])vaccine,mRNA-LNP,spikeprotein,preservativefree,50mcg/0.25mLdosage,forintramuscularuse                                                                  |
| 759695 | Severeacuterespiratorysyndromecoronavirus2(SARS-CoV-2)(coronavirusdisease[COVID-19])vaccine,mRNA-                                                                                                                                          |

LNP,spikeprotein,preservativefree,50mcg/0.5mLdosage,forintramuscularuse

|        |                                                                                                                                                                                                             |
|--------|-------------------------------------------------------------------------------------------------------------------------------------------------------------------------------------------------------------|
| 759735 | Severeacuterespiratorysyndromecoronavirus2(SARS-CoV-2)(coronavirusdisease[COVID-19])vaccine,recombinantspikeproteinnanoparticle,saponin-basedadjuvant,preservativefree,5mcg/0.5mLdosage,forintramuscularuse |
| 702866 | SARS-COV-2(COVID-19)vaccine,vectornon-replicating,recombinantspikeprotein-Ad26,preservativefree,0.5mL                                                                                                       |

### Supplementary Table 1.b: Acute Kidney Injury (AKI) Diagnostic Concept IDs

| Concept IDs | Concept name                                       |
|-------------|----------------------------------------------------|
| 4027117     | Acute diffuse nephritis                            |
| 4030519     | Acute drug-induced renal failure                   |
| 4137752     | Acute drug-induced tubulointerstitial nephritis    |
| 4058837     | Acute focal nephritis                              |
| 761083      | Acute injury of kidney                             |
| 37116430    | Acute kidney failure stage 1                       |
| 37116431    | Acute kidney failure stage 2                       |
| 37116432    | Acute kidney failure stage 3                       |
| 36716182    | Acute kidney injury due to circulatory failure     |
| 36716183    | Acute kidney injury due to hypovolemia             |
| 36716312    | Acute kidney injury due to sepsis                  |
| 37111531    | Acute kidney injury due to trauma                  |
| 44809061    | Acute kidney injury stage 1                        |
| 44809062    | Acute kidney injury stage 2                        |
| 44809063    | Acute kidney injury stage 3                        |
| 3180351     | Acute on chronic kidney injury                     |
| 45765710    | Acute on chronic tubulointerstitial nephritis      |
| 4232873     | Acute postoperative renal failure                  |
| 197329      | Acute renal failure due to acute cortical necrosis |
| 45757398    | Acute renal failure on dialysis                    |
| 3180540     | Acute renal failure secondary to lithium toxicity  |
| 197320      | Acute renal failure syndrome                       |
| 4160274     | Acute renal failure with oliguria                  |
| 4126305     | Acute renal impairment                             |
| 36716946    | Acute renal insufficiency                          |
| 4126439     | Acute scleroderma renal crisis                     |
| 444044      | Acute tubular necrosis                             |
| 4128067     | Acute-on-chronic renal failure                     |

**Supplementary Table 1.c: COVID-19 Infection Diagnostic Concept IDs**

| <b>Concept IDs</b> | <b>Concept name</b>                                                                                          |
|--------------------|--------------------------------------------------------------------------------------------------------------|
| 3661405            | Acute bronchitis caused by SARS-CoV-2                                                                        |
| 3655976            | Acute hypoxemic respiratory failure due to disease caused by severe acute respiratory syndrome coronavirus 2 |
| 3661748            | Acute kidney injury due to disease caused by severe acute respiratory syndrome coronavirus 2                 |
| 756044             | Acute respiratory distress syndrome (ARDS) caused by COVID-19                                                |
| 3661406            | Acute respiratory distress syndrome due to disease caused by severe acute respiratory syndrome coronavirus 2 |
| 756061             | Asymptomatic COVID-19                                                                                        |
| 3662381            | Asymptomatic SARS-CoV-2                                                                                      |
| 756031             | Bronchitis caused by COVID-19                                                                                |
| 3656667            | Cardiomyopathy due to disease caused by severe acute respiratory syndrome coronavirus 2                      |
| 3656668            | Conjunctivitis due to disease caused by severe acute respiratory syndrome coronavirus 2                      |
| 37311061           | COVID-19                                                                                                     |
| 37310269           | COVID-19                                                                                                     |
| 703441             | COVID-19 confirmed by laboratory test                                                                        |
| 3656669            | Dyspnea caused by severe acute respiratory syndrome coronavirus 2                                            |
| 702953             | Emergency use of U07.1   COVID-19                                                                            |
| 45756093           | Emergency use of U07.1   COVID-19, virus identified                                                          |
| 37310284           | Encephalopathy due to disease caused by severe acute respiratory syndrome coronavirus 2                      |
| 3661885            | Fever caused by severe acute respiratory syndrome coronavirus 2                                              |
| 37310283           | Gastroenteritis caused by SARS-CoV-2 (severe acute respiratory syndrome coronavirus 2)                       |
| 756081             | Infection of lower respiratory tract caused by COVID-19                                                      |
| 37310286           | Infection of upper respiratory tract caused by severe acute respiratory syndrome coronavirus 2               |
| 3663281            | Lower respiratory infection caused by SARS-CoV-2                                                             |
| 3661631            | Lymphocytopenia due to severe acute respiratory syndrome coronavirus 2                                       |
| 37310287           | Myocarditis due to disease caused by severe acute respiratory syndrome coronavirus 2                         |
| 37310254           | Otitis media due to disease caused by severe acute respiratory syndrome coronavirus 2                        |
| 713860             | Personal history of COVID-19                                                                                 |
| 3661408            | Pneumonia caused by SARS-CoV-2                                                                               |
| 713857             | Pneumonia due to coronavirus disease 2019                                                                    |
| 766502             | Post COVID-19 condition                                                                                      |
| 710708             | Post COVID-19 condition                                                                                      |
| 766503             | Post COVID-19 condition, unspecified                                                                         |
| 705076             | Post-acute COVID-19                                                                                          |
| 756039             | Respiratory infection caused by COVID-19                                                                     |

|         |                                                                                         |
|---------|-----------------------------------------------------------------------------------------|
| 3655977 | Rhabdomyolysis due to disease caused by severe acute respiratory syndrome coronavirus 2 |
| 3655975 | Sepsis due to disease caused by severe acute respiratory syndrome coronavirus 2         |
| 3661632 | Thrombocytopenia due to severe acute respiratory syndrome coronavirus 2                 |

### Supplementary Table 1.d: COVID-19 Infection Laboratory Test Concept IDs

| Concept IDs | Concept name                                                                                                             |
|-------------|--------------------------------------------------------------------------------------------------------------------------|
| 756055      | Measurement of Severe acute respiratory syndrome coronavirus 2 (SARS-CoV-2)                                              |
| 40763330    | SARS coronavirus RNA [Presence] in Isolate by NAA with probe detection                                                   |
| 3031852     | SARS coronavirus RNA [Presence] in Specimen by NAA with probe detection                                                  |
| 586515      | SARS-CoV-2 (COVID-19) Ab [Presence] in Serum or Plasma by Immunoassay                                                    |
| 586522      | SARS-CoV-2 (COVID-19) Ab [Units/volume] in Serum or Plasma by Immunoassay                                                |
| 706179      | SARS-CoV-2 (COVID-19) Ab panel - Serum or Plasma by Immunoassay                                                          |
| 706176      | SARS-CoV-2 (COVID-19) Ab panel - Serum, Plasma or Blood by Rapid immunoassay                                             |
| 36032419    | SARS-CoV-2 (COVID-19) Ag [Presence] in Upper respiratory specimen by Immunoassay                                         |
| 36033641    | SARS-CoV-2 (COVID-19) Ag [Presence] in Upper respiratory specimen by Rapid immunoassay                                   |
| 723473      | SARS-CoV-2 (COVID-19) IgA Ab [Presence] in Serum or Plasma by Immunoassay                                                |
| 586527      | SARS-CoV-2 (COVID-19) IgG Ab [Presence] in DBS by Immunoassay                                                            |
| 706181      | SARS-CoV-2 (COVID-19) IgG Ab [Presence] in Serum, Plasma or Blood by Rapid immunoassay                                   |
| 706177      | SARS-CoV-2 (COVID-19) IgG Ab [Units/volume] in Serum or Plasma by Immunoassay                                            |
| 723479      | SARS-CoV-2 (COVID-19) IgG+IgM Ab [Presence] in Serum or Plasma by Immunoassay                                            |
| 723475      | SARS-CoV-2 (COVID-19) IgM Ab [Presence] in Serum or Plasma by Immunoassay                                                |
| 706180      | SARS-CoV-2 (COVID-19) IgM Ab [Presence] in Serum, Plasma or Blood by Rapid immunoassay                                   |
| 706178      | SARS-CoV-2 (COVID-19) IgM Ab [Units/volume] in Serum or Plasma by Immunoassay                                            |
| 706157      | SARS-CoV-2 (COVID-19) N gene [Cycle Threshold #] in Specimen by Nucleic acid amplification using CDC primer-probe set N1 |
| 706155      | SARS-CoV-2 (COVID-19) N gene [Cycle Threshold #] in Specimen by Nucleic acid amplification using CDC primer-probe set N2 |
| 715272      | SARS-CoV-2 (COVID-19) N gene [Presence] in Nasopharynx by NAA with probe detection                                       |
| 36033644    | SARS-CoV-2 (COVID-19) N gene [Presence] in Nose by NAA with non-probe detection                                          |
| 757678      | SARS-CoV-2 (COVID-19) N gene [Presence] in Nose by NAA with probe detection                                              |
| 36661378    | SARS-CoV-2 (COVID-19) N gene [Presence] in Saliva (oral fluid) by NAA with probe detection                               |

|          |                                                                                                                            |
|----------|----------------------------------------------------------------------------------------------------------------------------|
| 36032258 | SARS-CoV-2 (COVID-19) N gene [Presence] in Saliva (oral fluid) by Nucleic acid amplification using CDC primer-probe set N1 |
| 706175   | SARS-CoV-2 (COVID-19) N gene [Presence] in Specimen by NAA with probe detection                                            |
| 706156   | SARS-CoV-2 (COVID-19) N gene [Presence] in Specimen by Nucleic acid amplification using CDC primer-probe set N1            |
| 706154   | SARS-CoV-2 (COVID-19) N gene [Presence] in Specimen by Nucleic acid amplification using CDC primer-probe set N2            |
| 36033640 | SARS-CoV-2 (COVID-19) ORF1ab region [Units/volume] (viral load) in Upper respiratory specimen by NAA with probe detection  |
| 715262   | SARS-CoV-2 (COVID-19) RNA [Log #/volume] (viral load) in Specimen by NAA with probe detection                              |
| 723476   | SARS-CoV-2 (COVID-19) RNA [Presence] in Nasopharynx by NAA with non-probe detection                                        |
| 586526   | SARS-CoV-2 (COVID-19) RNA [Presence] in Nasopharynx by NAA with probe detection                                            |
| 757677   | SARS-CoV-2 (COVID-19) RNA [Presence] in Nose by NAA with probe detection                                                   |
| 715260   | SARS-CoV-2 (COVID-19) RNA [Presence] in Saliva (oral fluid) by NAA with probe detection                                    |
| 706170   | SARS-CoV-2 (COVID-19) RNA [Presence] in Specimen by NAA with probe detection                                               |
| 706169   | SARS-CoV-2 (COVID-19) RNA panel - Specimen by NAA with probe detection                                                     |
| 723470   | SARS-CoV-2 (COVID-19) RdRp gene [Cycle Threshold #] in Specimen by NAA with probe detection                                |
| 706173   | SARS-CoV-2 (COVID-19) RdRp gene [Presence] in Specimen by NAA with probe detection                                         |
| 586516   | SARS-CoV-2 (COVID-19) [Presence] in Specimen by Organism specific culture                                                  |
| 757680   | SARS-CoV-2 (COVID-19) neutralizing antibody [Presence] in Serum by pVNT                                                    |
| 757679   | SARS-CoV-2 (COVID-19) neutralizing antibody [Titer] in Serum by pVNT                                                       |
| 36031944 | SARS-CoV-2 (COVID-19) specific TCRB gene rearrangements [Presence] in Blood by Sequencing                                  |
| 36033667 | SARS-CoV-2 (COVID-19) variant [Type] in Specimen by Sequencing                                                             |
| 706174   | SARS-related coronavirus E gene [Presence] in Specimen by NAA with probe detection                                         |
| 706171   | SARS-related coronavirus N gene [Presence] in Specimen by Nucleic acid amplification using CDC primer-probe set N3         |
| 723472   | SARS-related coronavirus RNA [Presence] in Specimen by NAA with probe detection                                            |



**Supplementary Table 2: Baseline Characteristics of AKI Patients of COVID-19 Vaccination Group and Infection Group**

|                        | <b>Overall AKI<br/>(N=196,352)<br/>no.(%)</b> | <b>AKI of the<br/>Vaccination Group<br/>(N=19,621)<br/>no.(%)</b> | <b>AKI of the<br/>Infection Group<br/>(N=176,731)<br/>no.(%)</b> | <b>P value*</b> |
|------------------------|-----------------------------------------------|-------------------------------------------------------------------|------------------------------------------------------------------|-----------------|
| Age, mean(SD), y       | 63.94 (15.81)                                 | 63.91 (15.22)                                                     | 63.95 (15.87)                                                    | <0.001          |
| Age category, y        |                                               |                                                                   |                                                                  |                 |
| <30                    | 6,631 ( 3.4)                                  | 584 (3.0)                                                         | 6,047 (3.4)                                                      | <0.001          |
| 30-49                  | 29,173 (14.9)                                 | 2,780 (14.2)                                                      | 26,393 (14.9)                                                    |                 |
| 50-64                  | 53,050 (27.0)                                 | 5,646 (28.8)                                                      | 47,404 (26.8)                                                    |                 |
| 65-90                  | 107,498 (54.7)                                | 10,611 (54.1)                                                     | 96,887 (54.8)                                                    |                 |
| Race                   |                                               |                                                                   |                                                                  |                 |
| White                  | 125,360 (63.8)                                | 12,331 (62.8)                                                     | 113,029 (64.0)                                                   | <0.001          |
| Black                  | 40,472 (20.6)                                 | 4,487 (22.9)                                                      | 35,985 (20.4)                                                    |                 |
| Asian                  | 4,416 ( 2.2)                                  | 463 (2.4)                                                         | 3,953 (2.2)                                                      |                 |
| Other                  | 7,451 ( 3.8)                                  | 549 (2.8)                                                         | 6,902 (3.9)                                                      |                 |
| Unknown                | 18,653 ( 9.5)                                 | 1,791 (9.1)                                                       | 16,862 (9.5)                                                     |                 |
| Gender                 |                                               |                                                                   |                                                                  |                 |
| Female                 | 85,116 (43.3)                                 | 9,598 (48.9)                                                      | 75,518 (42.7)                                                    | <0.001          |
| Male                   | 111,236 (56.7)                                | 10,023 (51.1)                                                     | 101,213 (57.3)                                                   |                 |
| Ethnicity              |                                               |                                                                   |                                                                  |                 |
| Hispanic or Latino     | 17,264 (8.8)                                  | 1,272 (6.5)                                                       | 15,992 (9.0)                                                     | <0.001          |
| Not Hispanic or Latino | 165,450 (84.3)                                | 17,462 (89.0)                                                     | 147,988 (83.7)                                                   |                 |
| Unknown                | 13,638 (6.9)                                  | 887 (4.5)                                                         | 12,751 (7.2)                                                     |                 |
| AKI defined by         |                                               |                                                                   |                                                                  |                 |
| Only diagnostic codes  | 26,466 (13.5)                                 | 3,518 (17.9)                                                      | 22,948 (13.0)                                                    | <0.001          |
| Only Scr# changes      | 96,724 (49.3)                                 | 11,351 (57.9)                                                     | 85,373 (48.3)                                                    |                 |
| Both methods           | 73,162 (37.3)                                 | 4,752 (24.2)                                                      | 68,410 (38.7)                                                    |                 |
| Previous AKI history   | 20,097 (10.2)                                 | 4138 (21.1)                                                       | 15,959 ( 9.0)                                                    | <0.001          |
| Hypertension           | 74,986 (38.2)                                 | 11,785 (60.1)                                                     | 63,201 (35.8)                                                    | <0.001          |

|                        | <b>Overall AKI<br/>(N=196,352)<br/>no.(%)</b> | <b>AKI of the<br/>Vaccination Group<br/>(N=19,621)<br/>no.(%)</b> | <b>AKI of the<br/>Infection Group<br/>(N=176,731)<br/>no.(%)</b> | <b>P value*</b> |
|------------------------|-----------------------------------------------|-------------------------------------------------------------------|------------------------------------------------------------------|-----------------|
| Diabetes mellitus      | 28,116 (14.3)                                 | 4,644 (23.7)                                                      | 23,472 (13.3)                                                    | <0.001          |
| Heart failure          | 27,353 (13.9)                                 | 5,052 (25.7)                                                      | 22,,301 (12.6)                                                   | <0.001          |
| Cardiovascular disease | 58,310 (29.7)                                 | 9,781 (49.8)                                                      | 48,529 (27.5)                                                    | <0.001          |
| Obesity                | 25,097 (12.8)                                 | 4,245 (21.6)                                                      | 20,852 (11.8)                                                    | <0.001          |
| Period of strains      |                                               |                                                                   |                                                                  |                 |
| P1: Alpha              | -                                             | -                                                                 | 33,881 (19.2)                                                    | <0.001          |
| P2: Delta              | -                                             | -                                                                 | 65,215 (36.9)                                                    | <0.001          |
| P3: Omicron            | -                                             | -                                                                 | 77,635 (43.9)                                                    | <0.001          |
| Vaccine types          |                                               |                                                                   |                                                                  |                 |
| mRNA                   | -                                             | 16,455(83.9)                                                      | -                                                                | <0.001          |
| Viral vector           | -                                             | 1,533(7.81)                                                       | -                                                                | <0.001          |
| Unknown^               | -                                             | 1,633(8.32)                                                       | -                                                                | <0.001          |
| Deceased               | -                                             | 610                                                               | 25,366                                                           | <0.01           |

# Abbreviation for Serum Creatinine.

\* Comparisons are made between no AKI and AKI using t-test for continuous variable and Chi-square test for categorical variables.

^ Types of COVID-19 vaccine were not reported.

## Supplementary Figure 1 a, b, c: Comparative Kaplan-Meier Analysis of Acute Kidney Injury Incidence within 30 Days Following the Exposure to COVID-19 Antigens by Different Phases Based on Predominant Strains Phases

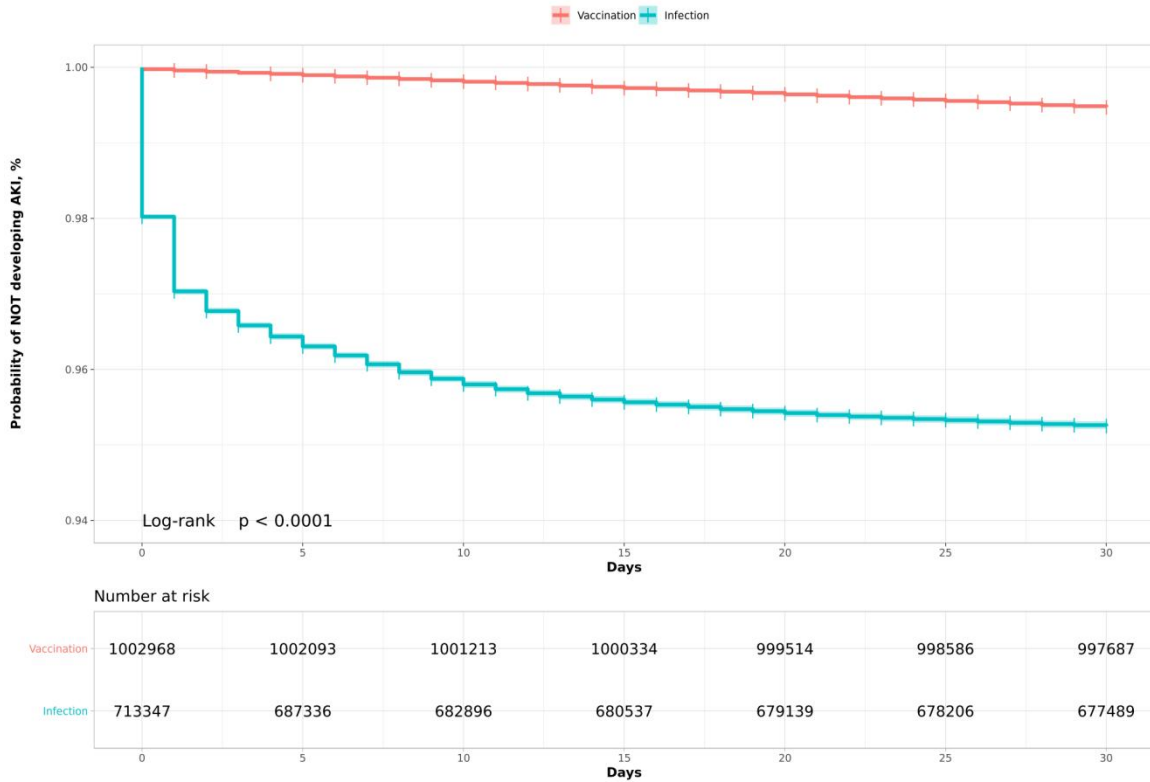

**Fig 1a. Comparative Kaplan-Meier Analysis of AKI Incidence in 30 Days after Exposure to COVID-19 Antigens in P1**

Note: Adults included in the study were categorized in two groups based on their initial exposure to COVID-19 in the phase over December 2020 to August 2023. The vaccine group: those whose first recorded COVID-19 vaccine dose preceded any infection formed the vaccine group; The infection group: those whose first documented COVID-19 infection occurred prior to any vaccination. This figure presents three panels corresponding to study phases aligned with COVID-19 strains. Phase 1 covers the Alpha variant from December 11, 2020, to April 1, 2021 (Fig 2a). Phase 2 spans the Delta variant era from April 1 to November 30, 2021 (Fig 2b). Phase 3 focuses on Omicron and its subvariants from December 1, 2021, to the study's end date (Fig 2c). The probability of developing AKI in the infection group was significantly higher than that in the vaccination group from day 0 to day 30 in every phase. Abbreviation: AKI-acute kidney injury

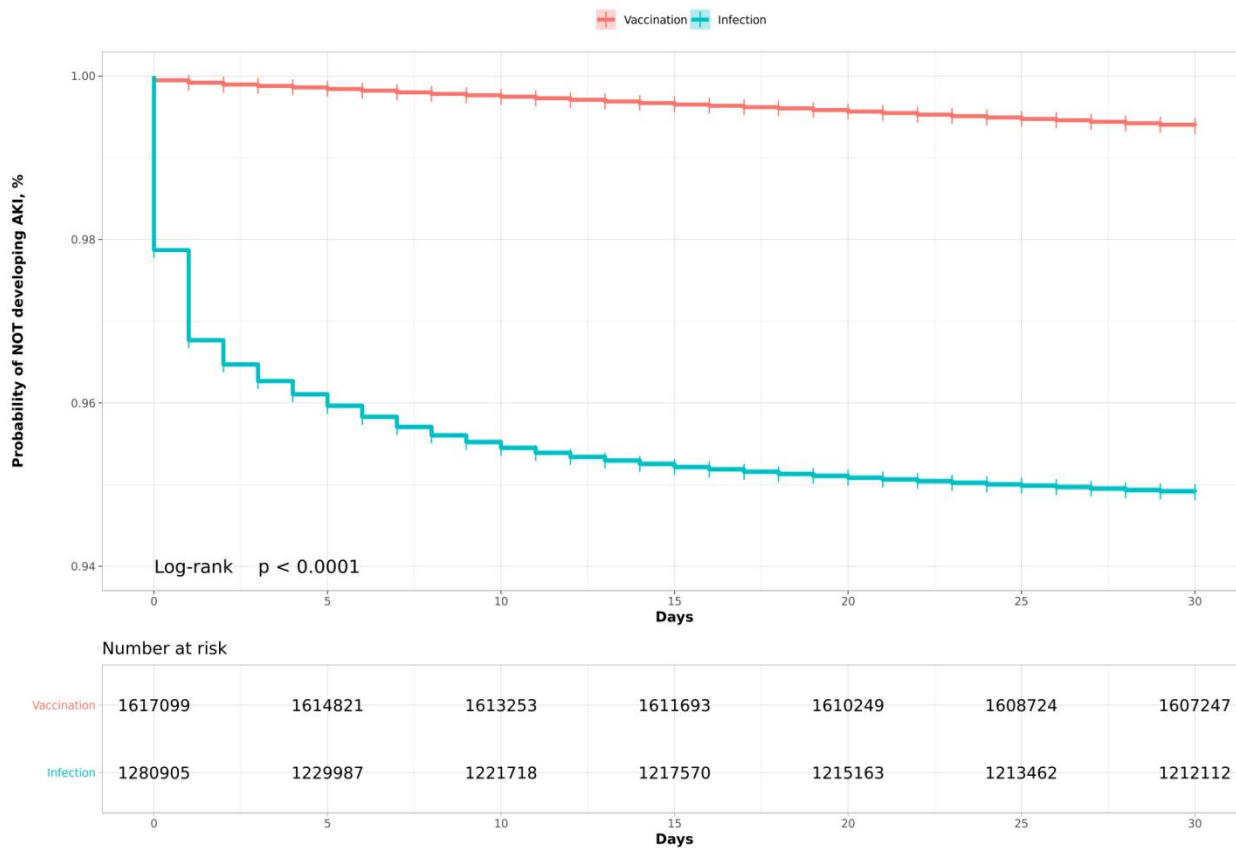

**Fig 1b. Comparative Kaplan-Meier Analysis of AKI Incidence in 30 Days after Exposure to COVID-19 Antigens in P2**

Note: Adults included in the study were categorized in two groups based on their initial exposure to COVID-19 in the phase over December 2020 to August 2023. The vaccine group: those whose first recorded COVID-19 vaccine dose preceded any infection formed the vaccine group; The infection group: those whose first documented COVID-19 infection occurred prior to any vaccination. This figure presents three panels corresponding to study phases aligned with COVID-19 strains. Phase 1 covers the Alpha variant from December 11, 2020, to April 1, 2021 (Fig 2a). Phase 2 spans the Delta variant era from April 1 to November 30, 2021 (Fig 2b). Phase 3 focuses on Omicron and its subvariants from December 1, 2021, to the study's end date (Fig 2c). The probability of developing AKI in the infection group was significantly higher than that in the vaccination group from day 0 to day 30 in every phase. Abbreviation: AKI-acute kidney injury

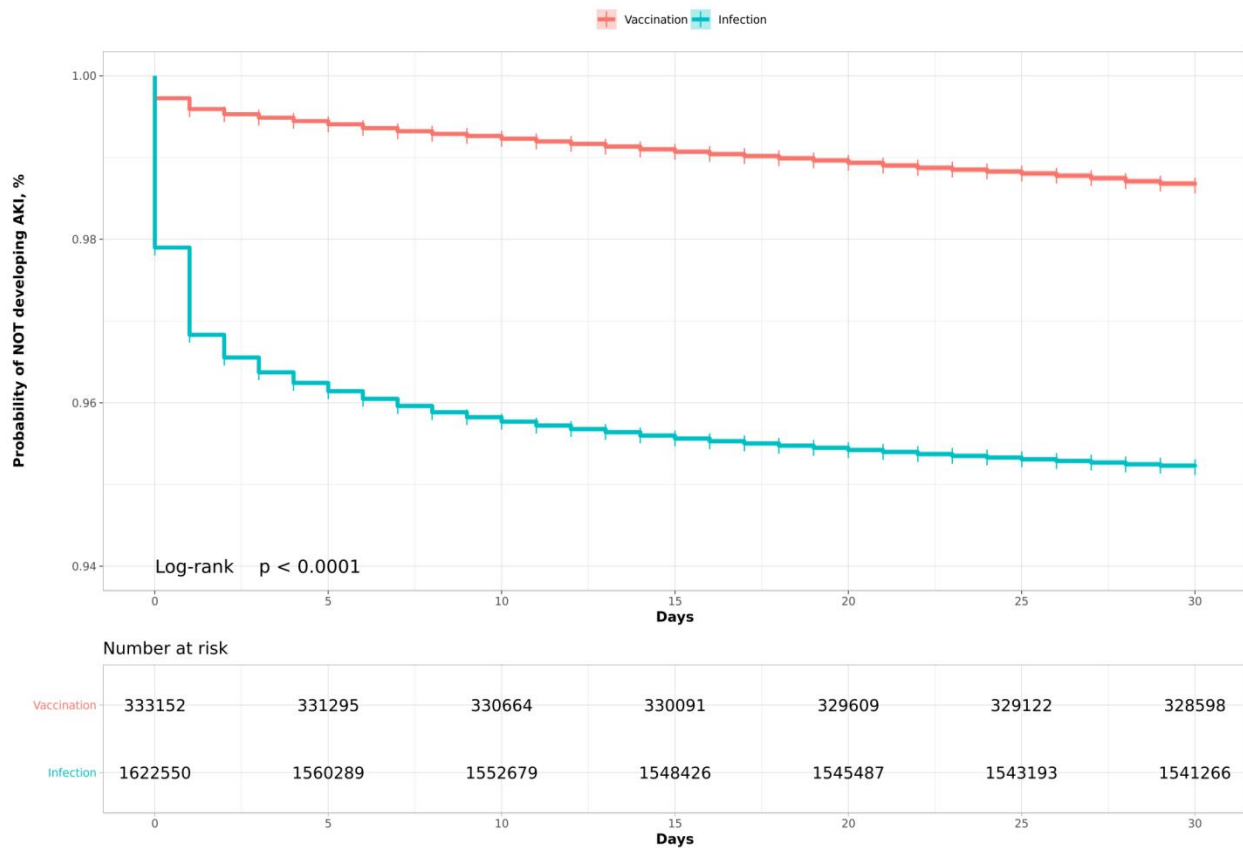

**Fig 1c. Comparative Kaplan-Meier Analysis of AKI Incidence in 30 Days after Exposure to COVID-19 Antigens in P3**

Note: Adults included in the study were categorized in two groups based on their initial exposure to COVID-19 in the phase over December 2020 to August 2023. The vaccine group: those whose first recorded COVID-19 vaccine dose preceded any infection formed the vaccine group; The infection group: those whose first documented COVID-19 infection occurred prior to any vaccination. This figure presents three panels corresponding to study phases aligned with COVID-19 strains. Phase 1 covers the Alpha variant from December 11, 2020, to April 1, 2021 (Fig 2a). Phase 2 spans the Delta variant era from April 1 to November 30, 2021 (Fig 2b). Phase 3 focuses on Omicron and its subvariants from December 1, 2021, to the study's end date (Fig 2c). The probability of developing AKI in the infection group was significantly higher than that in the vaccination group from day 0 to day 30 in every phase. Abbreviation: AKI-acute kidney injury

## Supplement Figure 2 a, b: Comparative Kaplan-Meier Analysis of Acute Kidney Injury Incidence after Exposure to COVID-19 Antigens in 60-day and 90-day Follow-up Periods

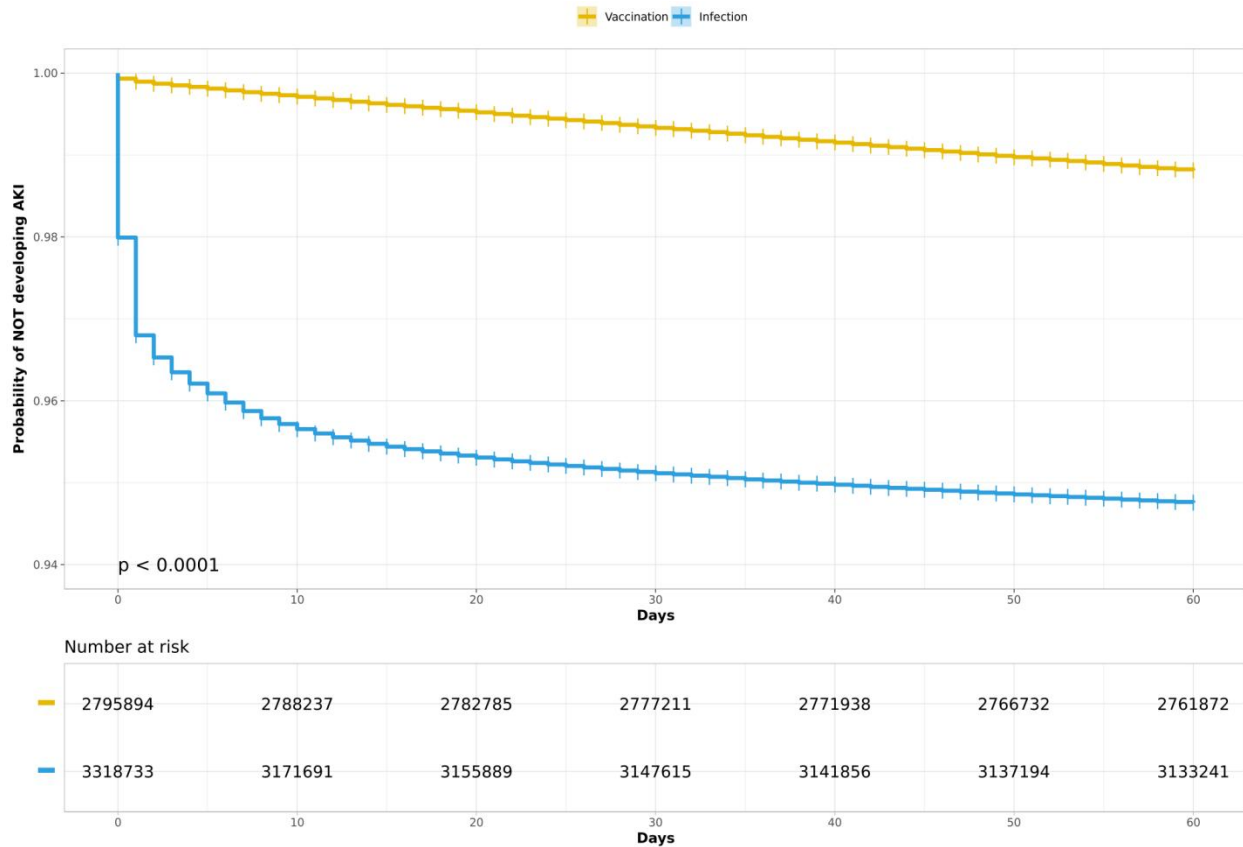

**Fig 2a. Comparative Kaplan-Meier Analysis of AKI Incidence after Exposure to COVID-19 Antigens in 60-day Follow-up Period**

Note: Adults included in the study were categorized in two groups based on their initial exposure to COVID-19 in the period from December 2020 to August 2023. The vaccine group: those whose first recorded COVID-19 vaccine dose preceded any infection formed the vaccine group; The infection group: those whose first documented COVID-19 infection occurred prior to any vaccination. The follow-up period was extended to 60 days for a secondary analysis. The probability of developing AKI in the infection group was significantly higher than that in the vaccination group from day 0 to day 60 (Log-Rank test,  $P < 0.001$ ). Abbreviation: AKI-acute kidney injury

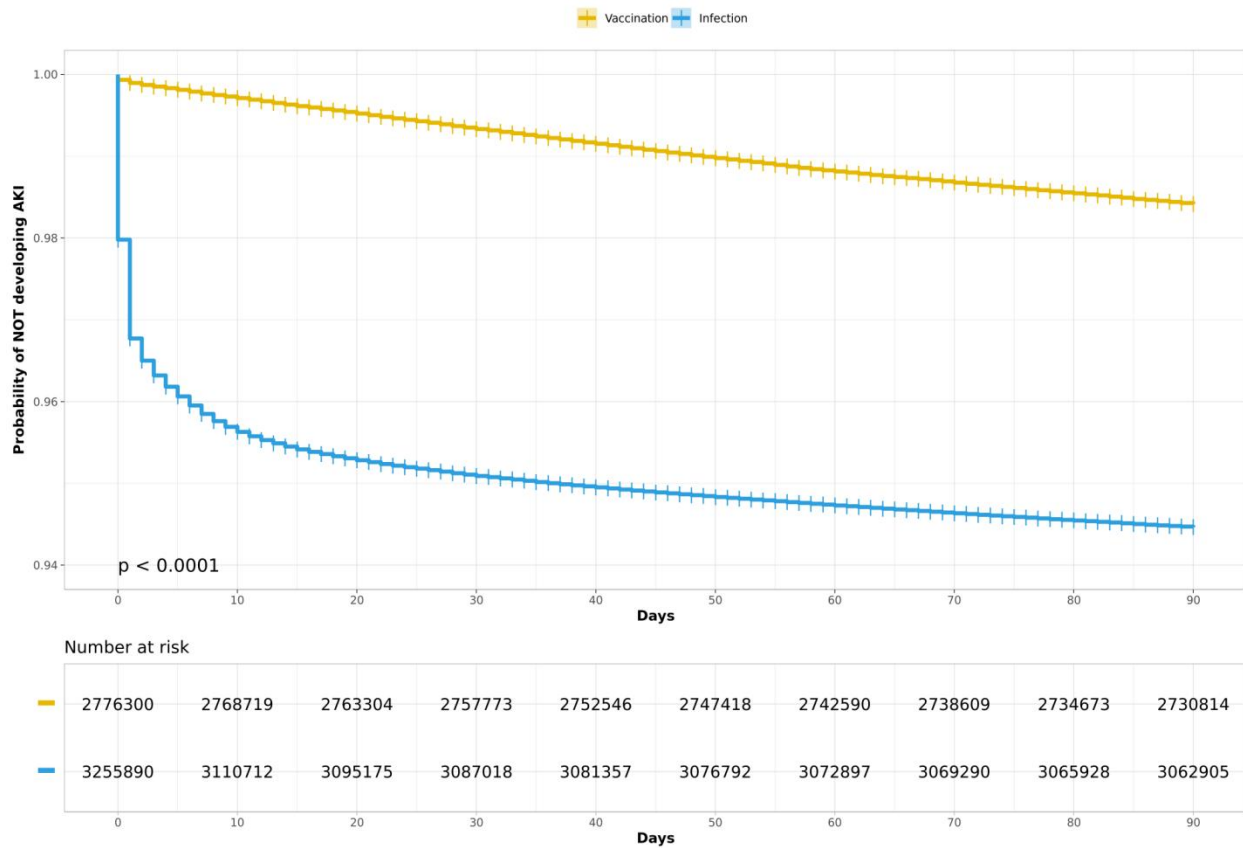

**Fig 2b. Comparative Kaplan-Meier Analysis of AKI Incidence after Exposure to COVID-19 Antigens in 90-day Follow-up Period**

Note: Adults included in the study were categorized in two groups based on their initial exposure to COVID-19 in the period from December 2020 to August 2023. The vaccine group: those whose first recorded COVID-19 vaccine dose preceded any infection formed the vaccine group; The infection group: those whose first documented COVID-19 infection occurred prior to any vaccination. The follow-up period was extended to 90 days for a secondary analysis. The probability of developing AKI in the infection group was significantly higher than that in the vaccination group from day 0 to day 90 (Log-Rank test,  $P < 0.001$ ). Abbreviation: AKI-acute kidney injury

### Supplement Figure 3: Association of COVID-19 Vaccination and Infection with AKI Outcomes: Multivariable-Adjusted Cox Model Results by Follow-up Periods, AKI Measurements, and Dominant COVID-19 Strains Phases

| Outcomes                                                   | Vaccination Group<br>AKI Patients(N) | Vaccination Group<br>Not AKI Patients(N) | Infection Group<br>AKI Patients(N) | Infection Group<br>Not AKI Patients(N) | Harzad Ratio |
|------------------------------------------------------------|--------------------------------------|------------------------------------------|------------------------------------|----------------------------------------|--------------|
| 30-Day Follow-up Period                                    | 19,621                               | 2,933,598                                | 176,731                            | 3,440,071                              | *            |
| 60-Day Follow-up Period                                    | 8,270                                | 2,944,949                                | 91,358                             | 3,525,444                              | *            |
| 90-Day Follow-up Period                                    | 16,103                               | 2,937,116                                | 153,783                            | 3,463,019                              | *            |
| Defined by Diagnostic Codes                                | 4,752                                | 2,948,467                                | 68,410                             | 3,548,392                              | **           |
| Defined by Diagnostic Codes<br>and Serum Creatinine Change | 33,240                               | 2,762,654                                | 174,007                            | 3,144,726                              | *            |
| Defined by Serum Creatinine<br>Change                      | 44,000                               | 2,732,300                                | 180,092                            | 3,075,798                              | **           |
| Phase 1: Alpha                                             | 5,304                                | 997,664                                  | 33,881                             | 679,466                                | **           |
| Phase 2: Delta                                             | 9,852                                | 1,607,247                                | 65,215                             | 1,215,690                              | **           |
| Phase 3: Omicron                                           | 4,465                                | 328,687                                  | 77,635                             | 1,544,915                              | *            |

Note: Adults included in the study were categorized in two groups based on their initial exposure to COVID-19 in the period from December 2020 to August 2023. The vaccine group: those whose first recorded COVID-19 vaccine dose preceded any infection formed the vaccine group; The infection group: those whose first documented COVID-19 infection occurred prior to any vaccination. Each row is an independent outcome. The primary outcome of a 30-day follow-up period, and (1) dividing study period into three phases aligned with predominant strains during the pandemic era.<sup>31</sup> Alpha (Phase 1) covered December 11, 2020, to April 1, 2021; Delta (Phase 2) covered April 1, 2021, to November 30, 2021; Omicron and its subvariants (Phase 3) covered December 1, 2021, to the end date of study period; (2) extending follow-up period from 30 days to 60 and 90 days after the index date; (3) adopting different outcome measurements, including only defined by diagnostic codes, only defined by changes in serum creatinine, and a combination of both. All HR results favor COVID-19 vaccination. Abbreviation: AKI-acute kidney injury; Scr-Serum creatinine.



# STROBE<sup>1</sup> statement Checklist

|                              | Item No. | Recommendation                                                                                                                                                                                                                                                                                                                                                                                                                                                         | Page No. |
|------------------------------|----------|------------------------------------------------------------------------------------------------------------------------------------------------------------------------------------------------------------------------------------------------------------------------------------------------------------------------------------------------------------------------------------------------------------------------------------------------------------------------|----------|
| <b>Title and abstract</b>    | 1        | (a) Indicate the study's design with a commonly used term in the title or the abstract                                                                                                                                                                                                                                                                                                                                                                                 | 1        |
|                              |          | (b) Provide in the abstract an informative and balanced summary of what was done and what was found                                                                                                                                                                                                                                                                                                                                                                    | 2        |
| <b>Introduction</b>          |          |                                                                                                                                                                                                                                                                                                                                                                                                                                                                        |          |
| Background/<br>rationale     | 2        | Explain the scientific background and rationale for the investigation being reported                                                                                                                                                                                                                                                                                                                                                                                   | 3        |
| Objectives                   | 3        | State specific objectives, including any prespecified hypotheses                                                                                                                                                                                                                                                                                                                                                                                                       | 4        |
| <b>Methods</b>               |          |                                                                                                                                                                                                                                                                                                                                                                                                                                                                        |          |
| Study design                 | 4        | Present key elements of study design early in the paper                                                                                                                                                                                                                                                                                                                                                                                                                | 5        |
| Setting                      | 5        | Describe the setting, locations, and relevant dates, including periods of recruitment, exposure, follow-up, and data collection                                                                                                                                                                                                                                                                                                                                        | 5        |
| Participants                 | 6        | (a) <i>Cohort study</i> —Give the eligibility criteria, and the sources and methods of selection of participants. Describe methods of follow-up<br><i>Case-control study</i> —Give the eligibility criteria, and the sources and methods of case ascertainment and control selection. Give the rationale for the choice of cases and controls<br><i>Cross-sectional study</i> —Give the eligibility criteria, and the sources and methods of selection of participants | 7,8      |
|                              |          | (b) <i>Cohort study</i> —For matched studies, give matching criteria and number of exposed and unexposed<br><i>Case-control study</i> —For matched studies, give matching criteria and the number of controls per case                                                                                                                                                                                                                                                 | NA       |
| Variables                    | 7        | Clearly define all outcomes, exposures, predictors, potential confounders, and effect modifiers. Give diagnostic criteria, if applicable                                                                                                                                                                                                                                                                                                                               | 7, 10    |
| Data sources/<br>measurement | 8        | For each variable of interest, give sources of data and details of methods of assessment (measurement). Describe comparability of assessment methods if there is more than one group                                                                                                                                                                                                                                                                                   | 4,10     |
| Bias                         | 9        | Describe any efforts to address potential sources of bias                                                                                                                                                                                                                                                                                                                                                                                                              | 7,10,11  |
| Quantitative<br>variables    | 11       | Explain how quantitative variables were handled in the analyses. If applicable, describe which groupings were chosen and why                                                                                                                                                                                                                                                                                                                                           | 10       |
| Statistical<br>methods       | 12       | (a) Describe all statistical methods, including those used to control for confounding                                                                                                                                                                                                                                                                                                                                                                                  | 10,11    |
|                              |          | (b) Describe any methods used to examine subgroups and interactions                                                                                                                                                                                                                                                                                                                                                                                                    |          |
|                              |          | (c) Explain how missing data were addressed                                                                                                                                                                                                                                                                                                                                                                                                                            |          |
|                              |          | (d) <i>Cohort study</i> —If applicable, explain how loss to follow-up was addressed<br><i>Case-control study</i> —If applicable, explain how matching of cases and controls was addressed<br><i>Cross-sectional study</i> —If applicable, describe analytical methods taking account of sampling strategy                                                                                                                                                              |          |
|                              |          | (e) Describe any sensitivity analyses                                                                                                                                                                                                                                                                                                                                                                                                                                  |          |
| <b>Results</b>               |          |                                                                                                                                                                                                                                                                                                                                                                                                                                                                        |          |
| Participants                 | 13       | (a) Report numbers of individuals at each stage of study—eg numbers potentially eligible, examined for eligibility, confirmed eligible, included in the                                                                                                                                                                                                                                                                                                                | 12,13,9  |

|                          |    |                                                                                                                                                                                                              |          |
|--------------------------|----|--------------------------------------------------------------------------------------------------------------------------------------------------------------------------------------------------------------|----------|
|                          |    | study, completing follow-up, and analyzed                                                                                                                                                                    |          |
|                          |    | (b) Give reasons for non-participation at each stage                                                                                                                                                         |          |
|                          |    | (c) Consider use of a flow diagram                                                                                                                                                                           |          |
| Descriptive data         | 14 | (a) Give characteristics of study participants (eg demographic, clinical, social) and information on exposures and potential confounders                                                                     | 12,13    |
|                          |    | (b) Indicate number of participants with missing data for each variable of interest                                                                                                                          |          |
|                          |    | (c) <i>Cohort study</i> —Summarise follow-up time (eg, average and total amount)                                                                                                                             |          |
| Outcome data             | 15 | <i>Cohort study</i> —Report numbers of outcome events or summary measures over time                                                                                                                          | 12,13    |
|                          |    | <i>Case-control study</i> —Report numbers in each exposure category, or summary measures of exposure                                                                                                         |          |
|                          |    | <i>Cross-sectional study</i> —Report numbers of outcome events or summary measures                                                                                                                           |          |
| Main results             | 16 | (a) Give unadjusted estimates and, if applicable, confounder-adjusted estimates and their precision (eg, 95% confidence interval). Make clear which confounders were adjusted for and why they were included | 13,14,15 |
|                          |    | (b) Report category boundaries when continuous variables were categorized                                                                                                                                    |          |
|                          |    | (c) If relevant, consider translating estimates of relative risk into absolute risk for a meaningful time period                                                                                             |          |
| Other analyses           | 17 | Report other analyses done—eg analyses of subgroups and interactions, and sensitivity analyses                                                                                                               | 14,15    |
| <b>Discussion</b>        |    |                                                                                                                                                                                                              |          |
| Key results              | 18 | Summarize key results with reference to study objectives                                                                                                                                                     | 17       |
| Limitations              | 19 | Discuss limitations of the study, taking into account sources of potential bias or imprecision. Discuss both direction and magnitude of any potential bias                                                   | 20       |
| Interpretation           | 20 | Give a cautious overall interpretation of results considering objectives, limitations, multiplicity of analyses, results from similar studies, and other relevant evidence                                   | 17-20    |
| Generalisability         | 21 | Discuss the generalisability (external validity) of the study results                                                                                                                                        | 20-21    |
| <b>Other information</b> |    |                                                                                                                                                                                                              |          |
| Funding                  | 22 | Give the source of funding and the role of the funders for the present study and, if applicable, for the original study on which the present article is based                                                | 22       |

1. von Elm, E., Altman, D. G., Egger, M., Pocock, S. J., Gøtzsche, P. C., & Vandenbroucke, J. P. (STROBE Initiative). The Strengthening the Reporting of Observational Studies in Epidemiology (STROBE) statement: guidelines for reporting observational studies. *PLoS Med.* **4**, e296 (2007).
